# Supplementary material
Source: Springer Nature journal article supplement (https://www.springermedizin.de/resource/supplementary/13063_2009_414_MOESM1_ESM.pdf/9618218)
Supplement: MOESM1 [file 9618218]

Patient with Marfan syndrome

Screening for inclusion and exclusion criteria

Baseline investigations: MRI, echocardiography, skinbiopsy, blood control

**Randomization**

Losartan  
uptitration  
to 100 mg

No additional  
treatment

Skinbiopsy  
after 4 weeks

Skinbiopsy  
after 1 year

Echocardiography after 1 and 2  
years

**Final assessment with MRI after 3 years**
